# Supplementary material
Source: HighWire-hosted journal article supplement (https://bmjopen.bmj.com/content/12/5/e059129)
Supplement: inline-supplementary-material-2 [file inline-supplementary-material-2.xlsx]

## Sheet: Planilha1
Specialist Unit for Review Evidence (SURE) - Questions to assist with the critical appraisal of cross-sectional studies		Gebremichael MW et al (2018)	Vedam S et al (2019)	Dynes MM et al (2018)	Kujawski S et al (2015)	Burrowes S et al (2017)	Öztürk H et al (2020)	Larijani B et al (2018)
	Design	2	2	2	2	2	2	2		CRITICAL APPRAISAL SCORES
	Question	2	2	2	2	2	2	2		Individual item score (color and value)			(a) Did not cite explicitly the data collection date/time frame (e.g. month/year)
	Setting/location	2	2	2	2	2	2	2		0 = not or inadequately addressed or applied	1 = adequately addressed or applied	2 = well addressed or applied
	Selection	2	2	2	2	2	2	2		Total Score Appraisal by study design, color and value
	Characteristcs	2	2	2	2	2	2	2				Low quality	Moderate quality	High quality
	Exposure & outcomes	2	2	1	2	2	2	2		Qualitative studies		0-7	8-14	15-20
	Study size	2	2	2	1	2	2	2		Cross-sectional studies		0-9	10-17	18-24
	Statistics	2	2	2	2	1	2	2		Cohort study		0-9	10-17	18-24
	Eligibility	2	2	2	2	2	2	2		Quali-quantitative and convergent parallel mixed-method studies		0-4	2022-09-05	10-14
	Results	2	2	2	2	2	2	2
	Conflict of interest	2	2	2	2	2	2	2
	LImitations	2	2	2	2	2	1	0
	Total	24	24	23	23	23	23	22
	Country (year of research and data collection)	Ethiopia (2015)	USA (2010-2016)	Tanzania (2016)	Tanzania (2011-2012)	Ethiopia (2015)	Turkey (2019)	Iran (2010)
	Sample size	1.125	2.138	1.184	1.388	45	707	200
	Type of samples	1,125 women post-delivery	2138 women who experienced at least one pregancy in the US, including those currently pregnant	249 providers, 935 post-delivery clients	1,388 postpartum	45 (23 women who gave birth attended by a midwife, 3 women who had given birth at home, 15 3rd-year bachelor's degree midwifery students, and 4 practicing midwives)	357 patients, 350 nurses	200 patients from two hospitals in Tehran
	STRATEGIES/BEHAVIORS/OUTCOMES OF INTEREST	To increase respect and reduce abuse	Physical abuse, sexual abuse, verbal abuse, stigma and discrimination, failure to meet professional standards of care, poor rapport between women and providers, health system conditions and constraints	Friendliness, comfort, and attention; information and consent; non-abuse and kindness	Satisfaction with delivery, perceived quality of care for delivery, intention to delivery to the same facility for the next birth	Increase midwifery training in patient's rights and autonomy	Application of Patient Privacy Scale (PPS)	Two-part questionnaire administered by two interviewers
	INTERVENTIONS TO ACHIEVE IMPROVEMENTS	To avoid shouting, scolding, ignoring, to offer adequate information, to obtain consent, to avoid breaching in confidentiality and privacy, to avoid leaving women unattended, to allow women to participate in decision-making	Development of several new patient-designed indicators of mistreatment in maternity care; to prevent mistreatment, health care providers need to first consider how they can meet women’s socio-cultural, emotional and psychological needs; building collaborations to address factors that maintain racial and ethnic disparities; creating a culture of equity and individualized care and routine training …	Not to treat patients of different ages differently, not to discriminate, to avoid ageism; to respect confidentiality; to manage complications in labor and delivery; to allow companionship; to give information clearly; to give friendly, comforting and attentive care; to be patient; to provide mentoring for providers; strategies to reduce workplace stress, training on respectful maternity care,	Providers empathy; reduce Caesarian sections and financial burden on women and their families; provide information and education; privacy to complain	To strengthen professional ethics, communication skills, patients' rights, patient's choice, and patients' autonomy training; to explore ways to structure birh experiences in order to empower women; women-centered care	To bring the discussion of patient privacy into light	Train and observe confidentiality and privacy issues, to promote the observance of patients’ rights; both healthcare providers and recipients be informed about these issues; education may be provided upon admission or at any other appropriate time via provision of oral explanation as well as written media such as pamphlets, brochures, booklets, etc.; Health policy makers should develop and implem…
	RESULTS	More D and A: Disrespect and abuse (D and A) during delivery services was reported more among: women residing in urban compared with rural areas and women educated to grade 9 or above; women in the age groups 20–34, and 35 or above, compared to those below the age of 20 years, women who were heads of households reported more incidents of D and A compared with women living in a household headed by…	1 in 6 women experienced more than one type of mistreatment (being shouted at; ignored by healthcare providers/refusing request for help/failing to respond request; violation of physical privacy; healthcare providers threatening to withhold treatment or forcing them to accept treatment they did not want; physical abuse [aggressive physical contact, inappropriate sexual conduct, refusal to provide…	Receipt of respectful maternity care dimension 1 (RMC-D1) (friendliness, comfort, and attention): clients aged 30-39 and 40-49 years had signifcantly higher RMC-D1 scores than clients aged 15-19 years. Clients who experienced delivery complications had significantly lower RMC-D1 scores compared to those who did not report complications. Clients of providers who perceived they were paid fairly for…	Women who reported any disrespectful and abusive treatment during childbirth were less likely to be very satisfied with delivery, were less likely to rate the quality of care for delivery as excellent or very good, and were also less likely to plan to deliver at the same facility with their next child. Women were less likely to be very satisfied with their delivery if they had at least a secondar…	The quality of care offered at the facility seemed to be a factor in women's choice of home rather than facility birth; patients and providers first, and most frequently, mentioned verbal abuse; patients mention denial of preferred birth position, while providers report verbal abuse as the leading type of violation. Patients reported that providers often shouted at them or at other patients, mock…	Nurses and the patients in the public hospitals had statistically significantly higher overall privacy scores than those in the training and research hospitals. The overall privacy scale scores were higher and more statistically significant in the patients hospitalized in surgical clinics than those hospitalized in clinics for internal diseases and in single compared to married patients.	153 patients provided a correct definition of privacy, and 161 patients were aware of instances of privacy violation; 77 patients had good awareness of physician confidentiality, 46 patients believed that physicians could disclose patients' information to reduce or eliminate a significant risk of serious harm to others, 47 patients did not think it was necessary for physicians to obtain patients’…
	LIMITATIONS	Recall period of one year after delivery can be too long to remember details; there may be sampling bias due to focus on a single encounter in the previous year; excluded stilbirths, neonatal and infant deaths; underreporting by rural women due to their lack of awareness of their rights; did not include economic status in the analysis; information about facilites were not included	The sample is voluntary and not population-based; oversampling of communities that are often underrepresented in national studies on experience of care; women were more educated, older, and more likely to have been born in the US; samples of women from Hispanic, Asian, and other communities of color were lower than the national reported rates; lower representation from women who had more routine …	No differenciation in degree of disrespect; no random sampling, cannot make causal inferences and generalize findings; limited ability to identify all risk factors	Lack of a gold standard to measure disrespect and abuse; did not include some aspects of health system; unable to discern causality	Small sample; limited to a single geographic region; based on interview and not to direct observation	The current study was limited only to the opinions of nurses working in public hospitals in a city in Turkey and patients receiving inpatient treatment in these hospitals	The authors did not state the limitations of this study
Specialist Unit for Review Evidence (SURE) - Questions to assist with the critical appraisal of cross-sectional studies		Montesinos-Segura R et al (2017)	Lurie N et al (2004)	McMahon SA (2014)	Marin CR et al (2018)	Rodriguez ACI et al (2020)	Ring D et al (2017)	Ma CC (2014)
	Design	2	2	1	2	1	0	2
	Question	2	2	2	2	2	2	2
	Setting/location	2	2	2	2	2	1	2
	Selection	2	2	2	2	2	2	1
	Characteristcs	2	2	2	2	2	2	1
	Exposure & outcomes	2	2	2	2	2	2	1
	Study size	2	2	2	2	2	2	2
	Statistics	2	1	2	1	2	2	1
	Eligibility	1	2	2	1	2	2	1
	Results	1	1	1	1	2	2	1
	Conflict of interest	2	2	2	2	2	0	2
	LImitations	2	2	2	2	0	2	2
	Total	22	22	22	21	21	19	18
	Country (year of research and data collection)	Peru (2016)	USA (2001)	Tanzania (2011)	Brazil (2015)	USA (2017)	USA (1997-2013)	Taiwan (2012)
	Sample size	1.528	6.722	112	300	501	1.118	204
	Type of samples	1,528 women who delivered in 14 regional hospitals located in nine urban Peruvian cities	6,722 adults, age >18yr, living in the US, who speak English, Spanish, Mandarin, Cantonese, Vietnamese, or Korean	49 women, 27 male partners, 20 community health workers, 5 community leaders, 11 religious leaders	300 patients from a university hospital	143 pregnant; 358 postpartum	1,118 patients complaints	204 patients > 18 years-old
	STRATEGIES/BEHAVIORS/OUTCOMES OF INTEREST	Interventions to reduce the prevalence of disrespect and abuse should be promptly implemented, with different approaches in each region	Random phone interview	Feeling ignored or neglected, monetary demands or discriminatory treatment, verbal abuse, physical abuse	Touching the patient’s possessions without permission, changing the bed side table to a position that cannot be reached, and raising or lowering the window blinds without consulting the patient; Performing a technical procedure in an intimate area and changing the patient’s clothes without a screen; Embarrassment due to exposure of the body, lack of intimacy and disrespectful behavior by nursing …	Negative attitudes and unkind or disrespectful treatment; comments about weight; intense focus on high-risk status and potential negative outcomes based on woman's weight; inapropriate comments	Access and availability, humaneness and disrespect, communication, expectations of care and treatment, distrust and billing	To evaluate patient's concerns about privacy of EMRs data; to evaluate patient's behavioural responses of patients to their perception of information privacy concerns resulting from information practices of medical facilities
	INTERVENTIONS TO ACHIEVE IMPROVEMENTS	Face-to-face and virtual training might be used to enhance the capability of healthcare workers, and the importance of education to empower women should be emphasized; human resource centers for women to make complaints of disrespect and abuse safely and comfortably might be implemented; to measure the prevalence of disrespect and abuse at various time intervals; approaches specific to each setti…	To avoid negative perceptions of minority groups (low-income, low educational level, different races); to focus on approaches that can best improve the perceptions of respect	Patients may be made aware of women's rights; include providers in participatory trainings; trainings must be supported by health system; improve the working environment (general infrastructure, human resource shortages, deficiencies in supervision and skills training); inclusion of family members during labour and childbirth	To be more attentive to the patient’s space and respect the territoriality established by them, often with their personal objects and possessions. Small actions, such as changing the place of the cell phone or slippers, can symbolize the removal of territory and generate strong feelings of discomfort; nudity in front of strangers can be deeply iatrogenic. Within this context, the age, gender and …	Individualize approach to each woman's weight; take in mind the potential negative consequences of stigmatizing mothers for weight; compassionate care, free from stigma; stimulate breastfeeding, reduce negative expectations about breastfeeding; investigate postpartum depression symptoms	Improve patients' experiences (optimal communication strategies and costumer service), increase availability by phone or e-mail of the staff, improve communication strategies and empathy, to listen to, to respect, to make patients feel appreciated for who they are,	Institutions and governments need to ensure data protection to each individual; to protect data from use without patient's consent; to develop privacy protection policies to reduce patient's privacy information concerns
	RESULTS	1488 women experienced abuse; the most prevalent form of disrespect and abuse was non-dignified care, followed by non-consented care, and non-confidential care; the number of women who experienced two or more categories of disrespect and abuse concurrently was 1358, whereas that of women who experienced four or more categories concurrently was 850; women who delivered by cesarean had a higher pre…	Over 14% of blacks, 19% of Hispanics, and 20% of Asians reported they have been treated with disrespect by their doctor. Men (15.9%) were more likely than women (11.6%) to perceive being treated with disrespect by their doctor. Asian (24%) and Hispanic (23%) men were more likely than black (17%) and white (11%) men to perceive being treated with disrespect. 18% of persons without a college educat…	Women recounted events or circumstances that are described as abusive in maternal health literature: feeling ignored or neglected; monetary demands or discriminatory treatment; verbal abuse; and in rare instances physical abuse. As a response to abuse, women described acquiescence or non-confrontational strategies: resigning oneself to abuse, returning home, or bypassing certain facilities or pro…	The perception of invasion of territorial space was greater than that of personal space; the participants reported that touching their personal possessions without permission, changing the bedside table to a position that cannot be reached, and raising or lowering the window blinds without consulting the patient were attitudes of the nursing staff that annoyed them and caused a feeling of invasio…	Participants who reported having changed their provider had a significantly higher pre-pregnancy BMI (M = 42.79 ± 10.89) than those who did not (M = 32.92 ± 10.91), F (1, 478) = 28.02, p < 0.001. There was a significant difference in pre-pregnancy BMI among women who reported that too little (M = 31.29 ± 9.19), the right amount (M = 32.97 ± 11.07), and too much (M = 40.69 ± 11.58) attention was p…	Women reported more complaints in access and availability, humaneness and disrespect, and billing; patients aged 40 to 60 years were more likely to file a complaint in all categories except distrust (most common in patients over age 80) and research; most complaints concerned the surgeon (58%) or the administrative assistant (32%). Over half of all complaints were related to interpersonal issues …	Collection of information, secondary use of information and errors in data collection were primary factors in arousing patients’ information privacy protective responses toward electronic medical records (EMRs); governments and medical facilities should focus on these findings and develop EMR privacy protection policies to reduce people’s information privacy concerns; patients took protective res…
	LIMITATIONS	The aim was to generate a validated survey of disrespect and abuse suitable for all Peruvian hospitals; however, each geographic region has its own unique cultural features and traditions; it is possible that some of the items listed in the survey were not part of the disrespect and abuse construct in some contexts; the length of the survey was a limiting factor; the participants might have felt …	Relying on self-report, may not be accurate; could not disentangle how general life experiences influcence perceptions; could not examine ohter minorities; had insufficient number of native americans to analyse separately; lack of agreement on the definition of age-appropriate cancer screening	Rely on reports, not on direct observation; abuse was not evenly probed in each interview; captured insights of women who delivered several months earlier and may have a recall bias; did not reach data saturation; did not interview providers; did not identify and interview escorts	Non-random selection of the participants, the fact that it was performed in only one public hospital in Brazil, which serves predominantly the maternal and child public and, consequently, the significant number of female participants, unbalancing the sample with respect to gender. The cross-sectional nature of our study can only provide associations, the study evaluated only self-reported percept…	Sample was primarily white of higher socioeconomic status, large proportion from California, did not investigate other samples (low-income and racial/ethnic minority mothers), cannot be generalized	Limited to one hospital; underreporting of complaints, variability of complaints may be due to variability in ombusperson, patient may have the ideia that complaint would not be addressed, differences in reporting by age may be due to more treating patients that ages, complaints addressed only in major negative experiences	This study only looked at people who access Electronic Medical Records (EMRs) without authorisation as staff at the medical facility, which might ignore other unauthorised access by individuals not associated with the medical facility. Further, the external validity of the findings may be limited as the sample was collected from one hospital in Taiwan only. Consequently, inferences to other popul…
